# Supplementary material
Source: Springer Nature journal article supplement (https://www.springermedizin.de/resource/supplementary/12871_2012_164_MOESM1_ESM.pdf/9428968)

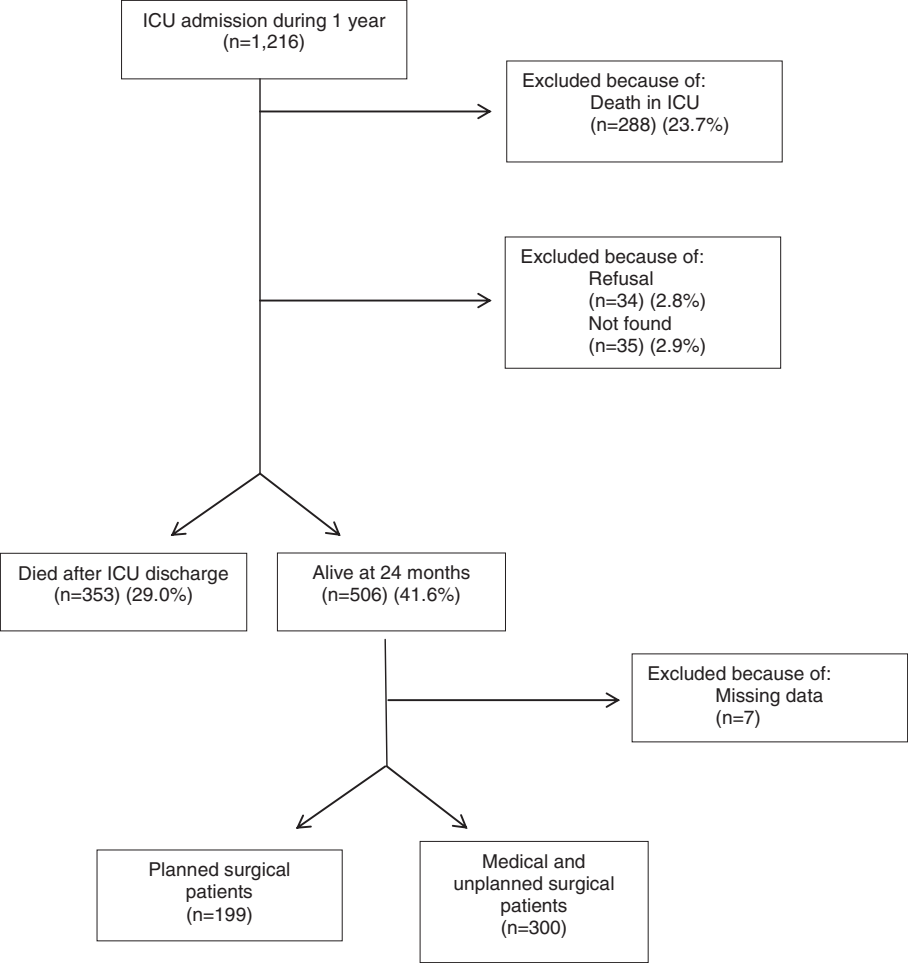

Supplement: MOESM1 [file 9428968]
